# Supplementary material for: Protein kinase CK2-dependent aerobic glycolysis-induced lactate dehydrogenase A enhances the migration and invasion of cancer cells
Source: PubMed Central journal article supplement (PMC6441004; doi:10.1038/s41598-019-41852-4), 2019-03-29

# **Protein kinase CK2-dependent aerobic glycolysis-induced lactate dehydrogenase A enhances the migration and invasion of cancer cells**

Dae-Kyun Im <sup>1</sup>, Heesun Cheong <sup>2</sup>, Jong Suk Lee<sup>3</sup>, Min-Kyu Oh <sup>1,\*</sup>, Kyung Mi Yang <sup>4,\*</sup>

## **Figure Legend for Supplemental Figures.**

**Supplemental Figure S1. Glucose depletion efficiently induces C $\alpha$  OE cell death.** (A) SW620 or (B) HT29 cells were cultured in Glc- or Gln-free DMEM and cell death was assessed by Annexin-PI staining at the 72-h time-point. Representative flow cytometry plots are shown. Q1: Viable cells; Q2: Apoptotic cells; Q3: Dead cells; Q4: Necrotic cells

**Supplemental Figure S2. Glucose contributes to glycolysis in SW620-C $\alpha$  OE cells.** The contribution of the metabolites, (A) lactate, (B) pyruvate, (C) palmitate, (D) citrate, (E) fumarate, (F) malate, (G) serine, and (H) glycine in the cell extracts was measured by GC-EI-MS.

**Supplemental Figure S3. Glutamine contributes to glycolysis in SW620-C $\alpha$  OE cells** The contribution of the metabolites, (A) lactate, (B) pyruvate, (C) palmitate, (D) citrate, (E) fumarate, and (F) malate in the cell extracts was measured by GC-EI-MS.

**Supplemental Figure S4. Stable isotope tracer analysis of [U-<sup>13</sup>C]-Glc in HT29-C $\alpha$  OE cells.** Cells ( $5 \times 10^6$ ) were cultured in Glc-depleted media containing 1 g/L U-<sup>13</sup>C<sub>6</sub>-Glc overnight before extraction. The contribution (red color) and relative intensity (blue color) of the metabolites, (A) lactate (M3), (B) pyruvate (M3), (C) palmitate (M1-16), (D) citrate (M3-

6), (E) fumarate (M2-4), (F) malate (M1-4), (G) serine (M1-3), and (H) glycine (M1-2) in the cell extracts were measured by GC-EI-MS. Values are expressed as the mean  $\pm$  SD (n=5; \* $p$  < 0.05; \*\* $p$  < 0.01).

**Supplemental Figure S5. Glucose contributes to glycolysis in HT29-C $\alpha$  OE cells.** The contribution of the metabolites, (A) lactate, (B) pyruvate, (C) palmitate, (D) citrate, (E) fumarate, (F) malate, (G) serine, and (H) glycine in the cell extracts was measured by GC-EI-MS.

**Supplemental Figure S6. Stable isotope tracer analysis of [U-<sup>13</sup>C]-Glc and metabolic change model in HT29-C $\alpha$  OE cells.** Cells ( $5 \times 10^6$ ) were cultured in Gln-depleted media containing 4 mM U-<sup>13</sup>C<sub>5</sub>-Gln overnight before extraction. The contribution (red color) and relative intensity (blue color) of the metabolites, (A) lactate (M1-3), (B) pyruvate (M1-3), (C) palmitate (M1-16), (D) citrate (M1-6), (E) fumarate (M1-4), and (F) malate (M1-4) in the cell extracts were measured by GC-EI-MS. Data are presented as bar graphs. Values are expressed as the mean  $\pm$  SD (n=5; \*\* $p$  < 0.01; \*\*\* $p$  < 0.001). (G) Flux map of central carbon metabolism C $\alpha$  OE cells predicted by isotope tracer analysis.

**Supplemental Figure S7. Glutamine contributes to glycolysis and TCA cycle in HT29-C $\alpha$  OE.** The contribution of the metabolites, (A) lactate, (B) pyruvate, (C) palmitate, (D) citrate, (E) fumarate, and (F) malate in the cell extracts was measured by GC-EI-MS.

**Supplemental Figure S8. Knockout of LDHA in C $\alpha$  OE cells.** Western blot analysis was performed using the indicated antibodies.

**Supplemental Figure S9. Cell cycle distribution of C $\alpha$  OE cells treated with FX11 and LDHA knockout.** Cells ( $3 \times 10^5$ ) were exposed to 10  $\mu$ M FX11 or transiently infected with the lentiviral system of *LDHA* KO for 48 h. (A, B) Cell cycle assessed by LSRII FACS analysis. Histogram representation of cell cycle distribution. (C, D) Bar graph representation of cell cycle populations: Sub-G1 (red columns); G1 (black columns); S (Grey column); G2/M (hatched).

**Supplemental Figure S10. LDHA knockout causes mitochondrial dysfunction.** (A) Visualization of ROS by superoxide-specific indicator MitoSOX red. Treatment with 5 mM NAC was associated with ROS production (n = 3). Scale bar, 500  $\mu$ m.

**Supplemental Figure S11. Reduced migration and invasion by ROS was not regulated by DM- $\alpha$ -KG.** (A, B) Cells ( $2 \times 10^5$ ) were exposed to 3 mM NAC or 10 mM Dimethyl- $\alpha$ -ketoglutarate (DM- $\alpha$ -KG) for 12 h. Migration and invasion were assessed by the chemotactic transwell assay. Original magnification, 200 $\times$ . Values are expressed as the mean  $\pm$  SD (n=3; \* $p$  < 0.05; \*\* $p$  < 0.01; \*\*\* $p$  < 0.001). Original magnification, 200 $\times$ . Scale bar, 500  $\mu$ m.

**Supplemental Figure S12. LDHA expression is increased in gastric cancer cells with high CK2 activity.** LDHA expression levels were assessed by Western blot analysis.

**Supplemental Figure S13. Inhibition of migration and invasion by LDHA knockout was restored by NAC.** (A) LDHA expression levels were assessed by Western blot analysis. (B, C) The reduced migration and invasion were restored by NAC. *LDHA* KO was performed with the CRISPR-cas9 system. Cells ( $2 \times 10^5$ ) were exposed to 3 mM NAC for the indicated time-

points. Migration and invasion were assessed by the chemotactic transwell assay. Original magnification, 200 $\times$ . Values are expressed as the mean  $\pm$  SD (n=3; \* $p$  < 0.01; \*\* $p$  < 0.01). Scale bar, 500  $\mu$ m.

# Supplementary Figure S1

**A.**

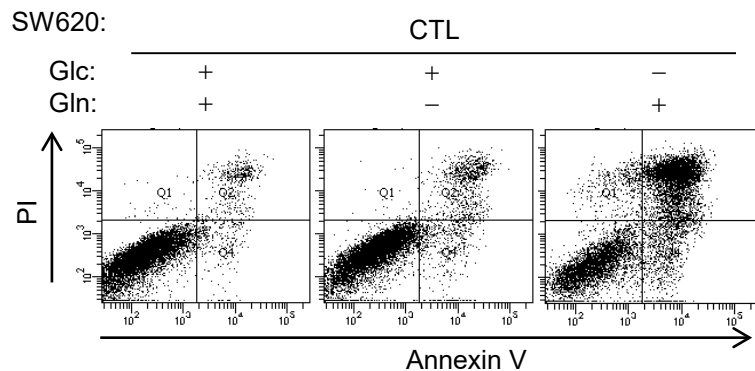

|    |      |    |      |    |      |
|----|------|----|------|----|------|
| Q1 | 0.4  | Q1 | 0.4  | Q1 | 4.3  |
| Q2 | 4.4  | Q2 | 8.7  | Q2 | 44.3 |
| Q3 | 92.1 | Q3 | 85.2 | Q3 | 40.9 |
| Q4 | 3.2  | Q4 | 5.7  | Q4 | 10.5 |

Ca OE

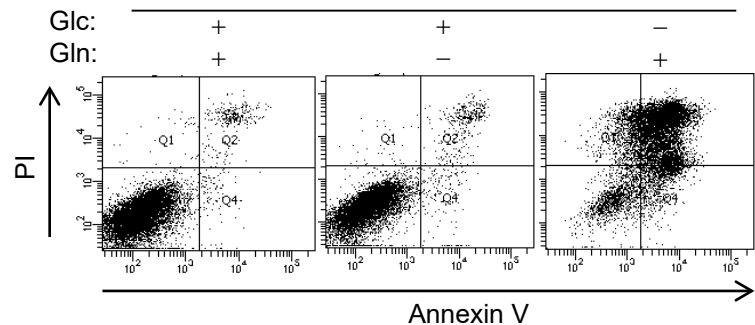

|    |      |    |      |    |      |
|----|------|----|------|----|------|
| Q1 | 0.4  | Q1 | 0.4  | Q1 | 11.2 |
| Q2 | 2.9  | Q2 | 3.6  | Q2 | 63.6 |
| Q3 | 95.7 | Q3 | 94.3 | Q3 | 13.3 |
| Q4 | 1.0  | Q4 | 1.7  | Q4 | 11.9 |

**B.**

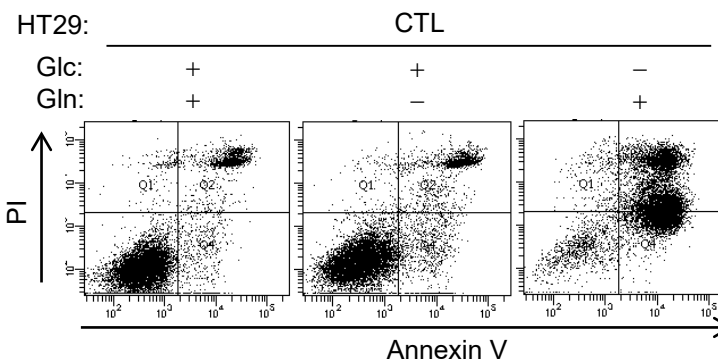

|    |      |    |      |    |      |
|----|------|----|------|----|------|
| Q1 | 1.5  | Q1 | 1.2  | Q1 | 2.8  |
| Q2 | 12.8 | Q2 | 14.0 | Q2 | 53.2 |
| Q3 | 80.6 | Q3 | 75.8 | Q3 | 9.1  |
| Q4 | 5.1  | Q4 | 9.1  | Q4 | 34.9 |

Ca OE

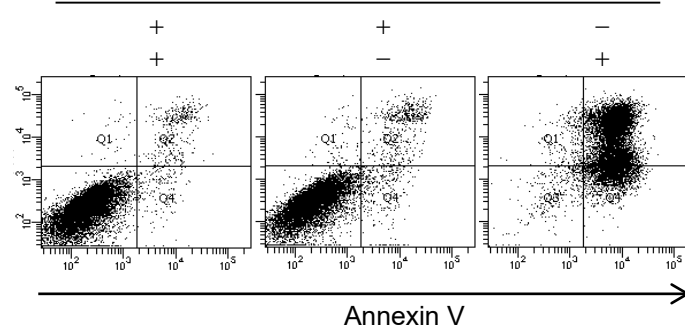

|    |      |    |      |    |      |
|----|------|----|------|----|------|
| Q1 | 0.4  | Q1 | 0.7  | Q1 | 2.3  |
| Q2 | 3.7  | Q2 | 5.2  | Q2 | 71.2 |
| Q3 | 94.1 | Q3 | 90.7 | Q3 | 3.2  |
| Q4 | 1.9  | Q4 | 3.4  | Q4 | 23.3 |

# Supplementary Figure S2

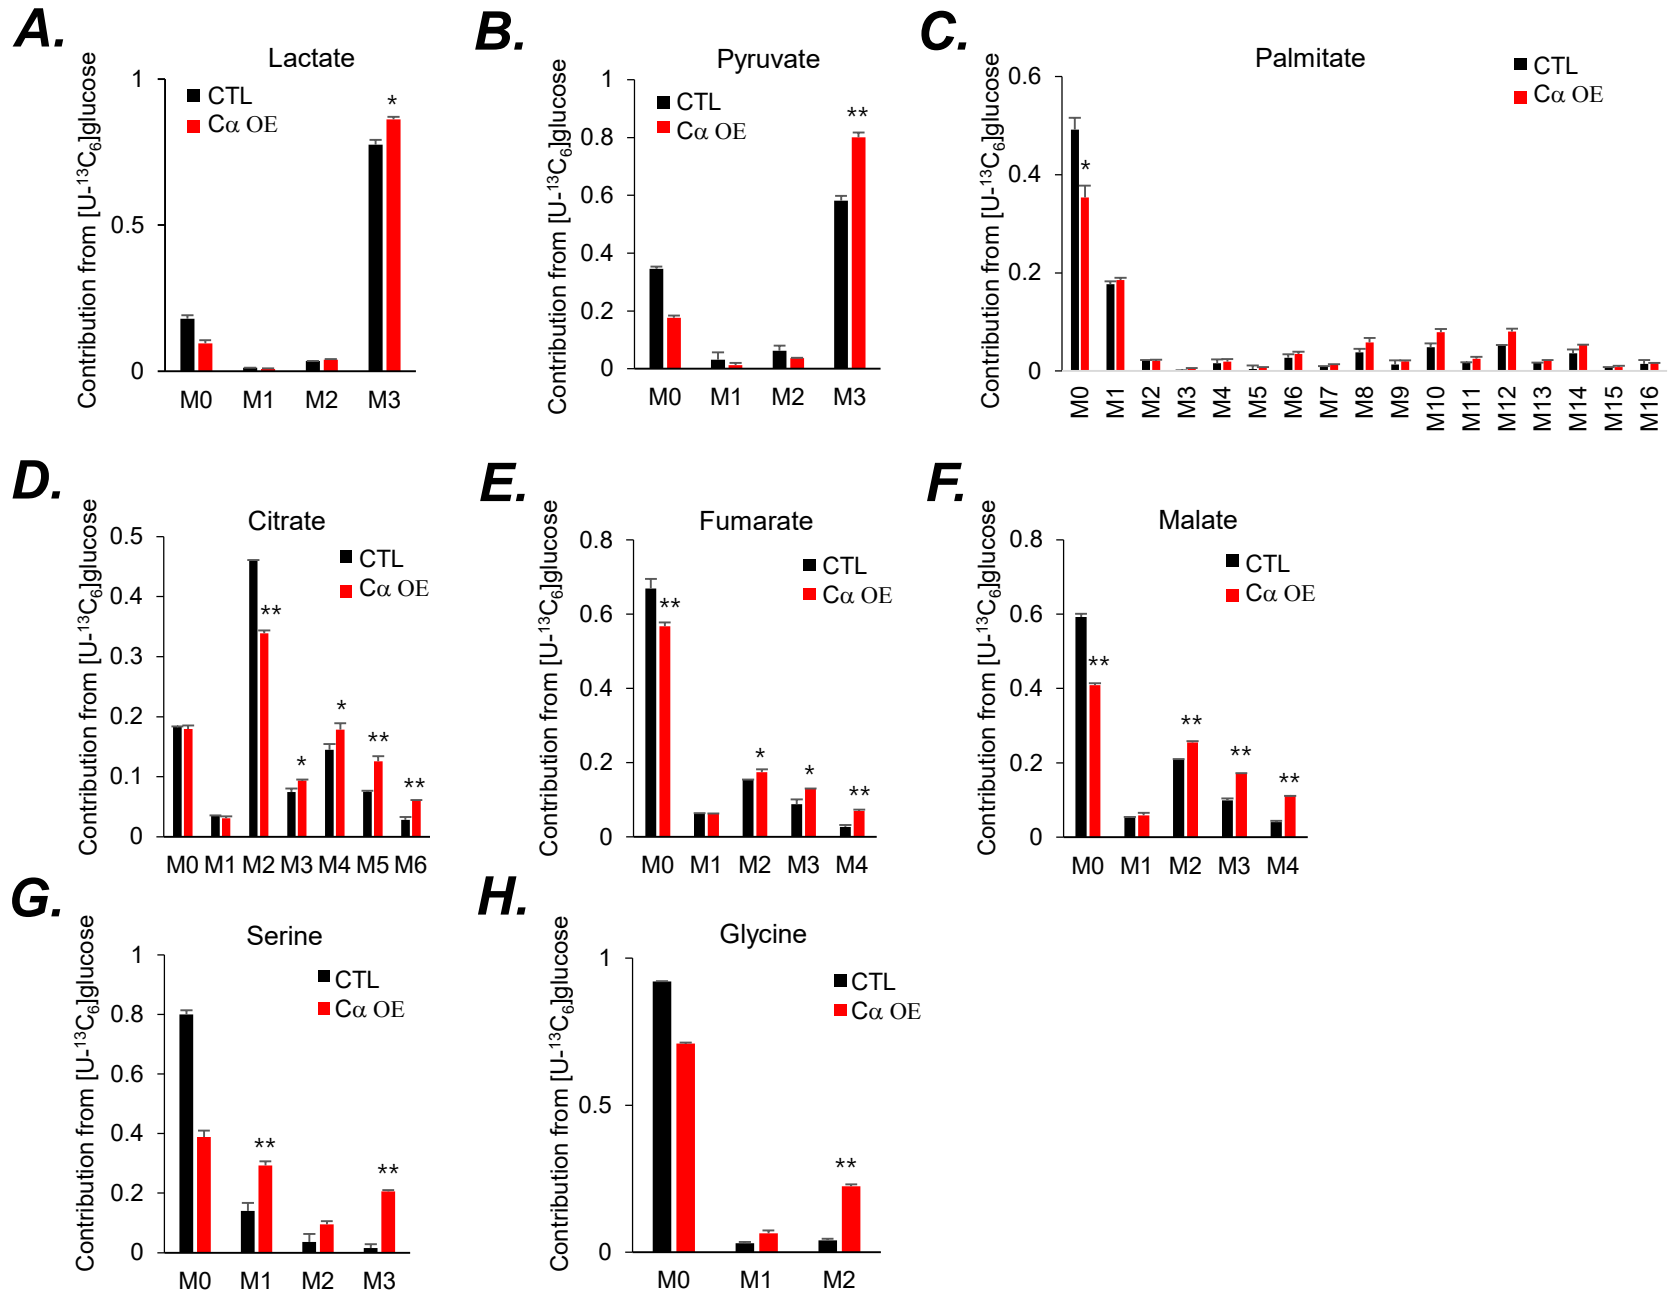

# Supplementary Figure S3

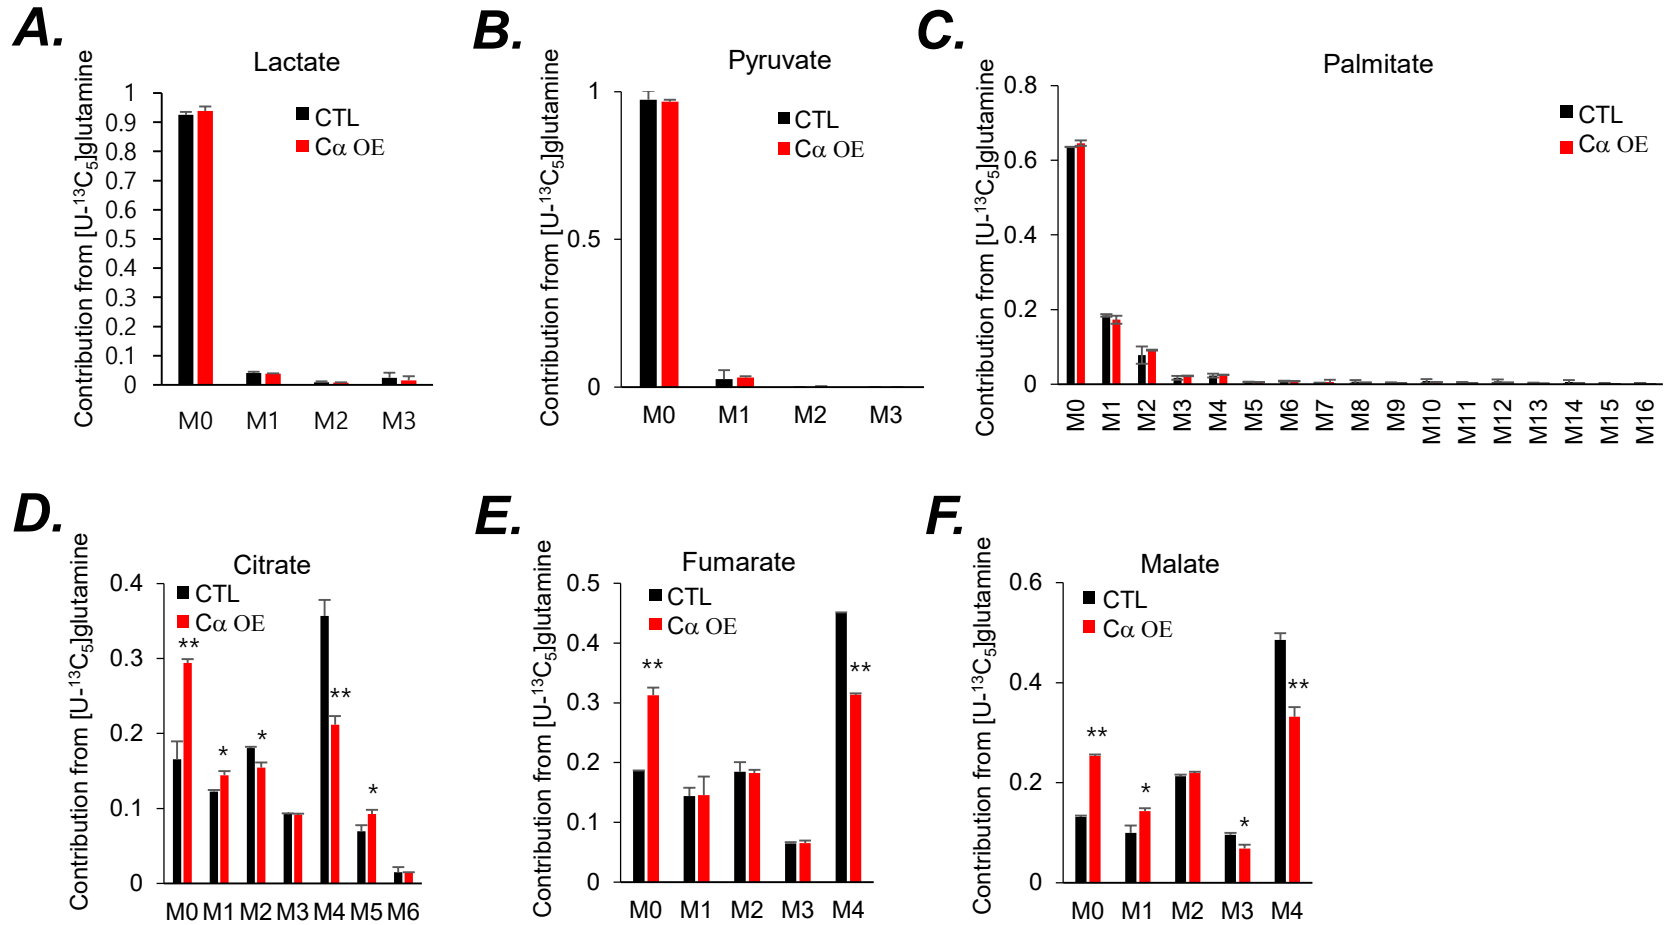

# Supplementary Figure S4

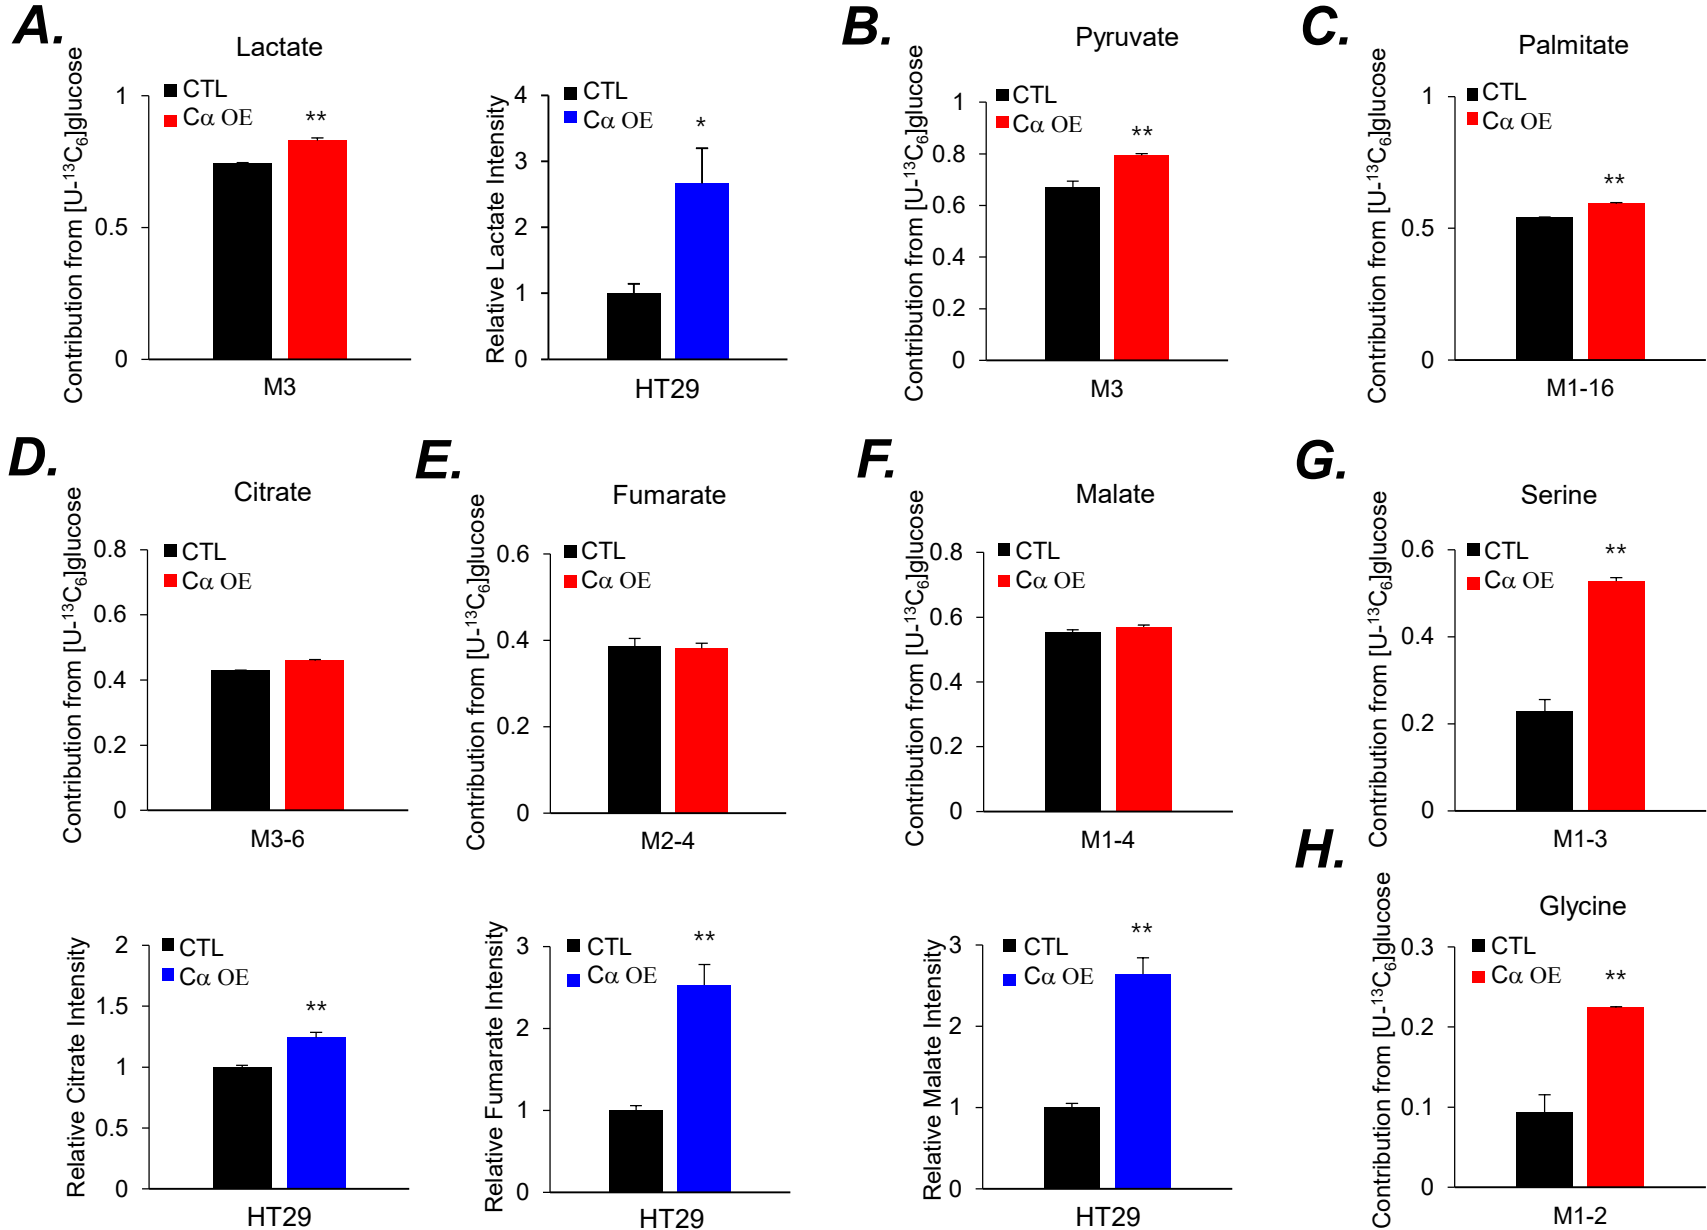



# Supplementary Figure S5

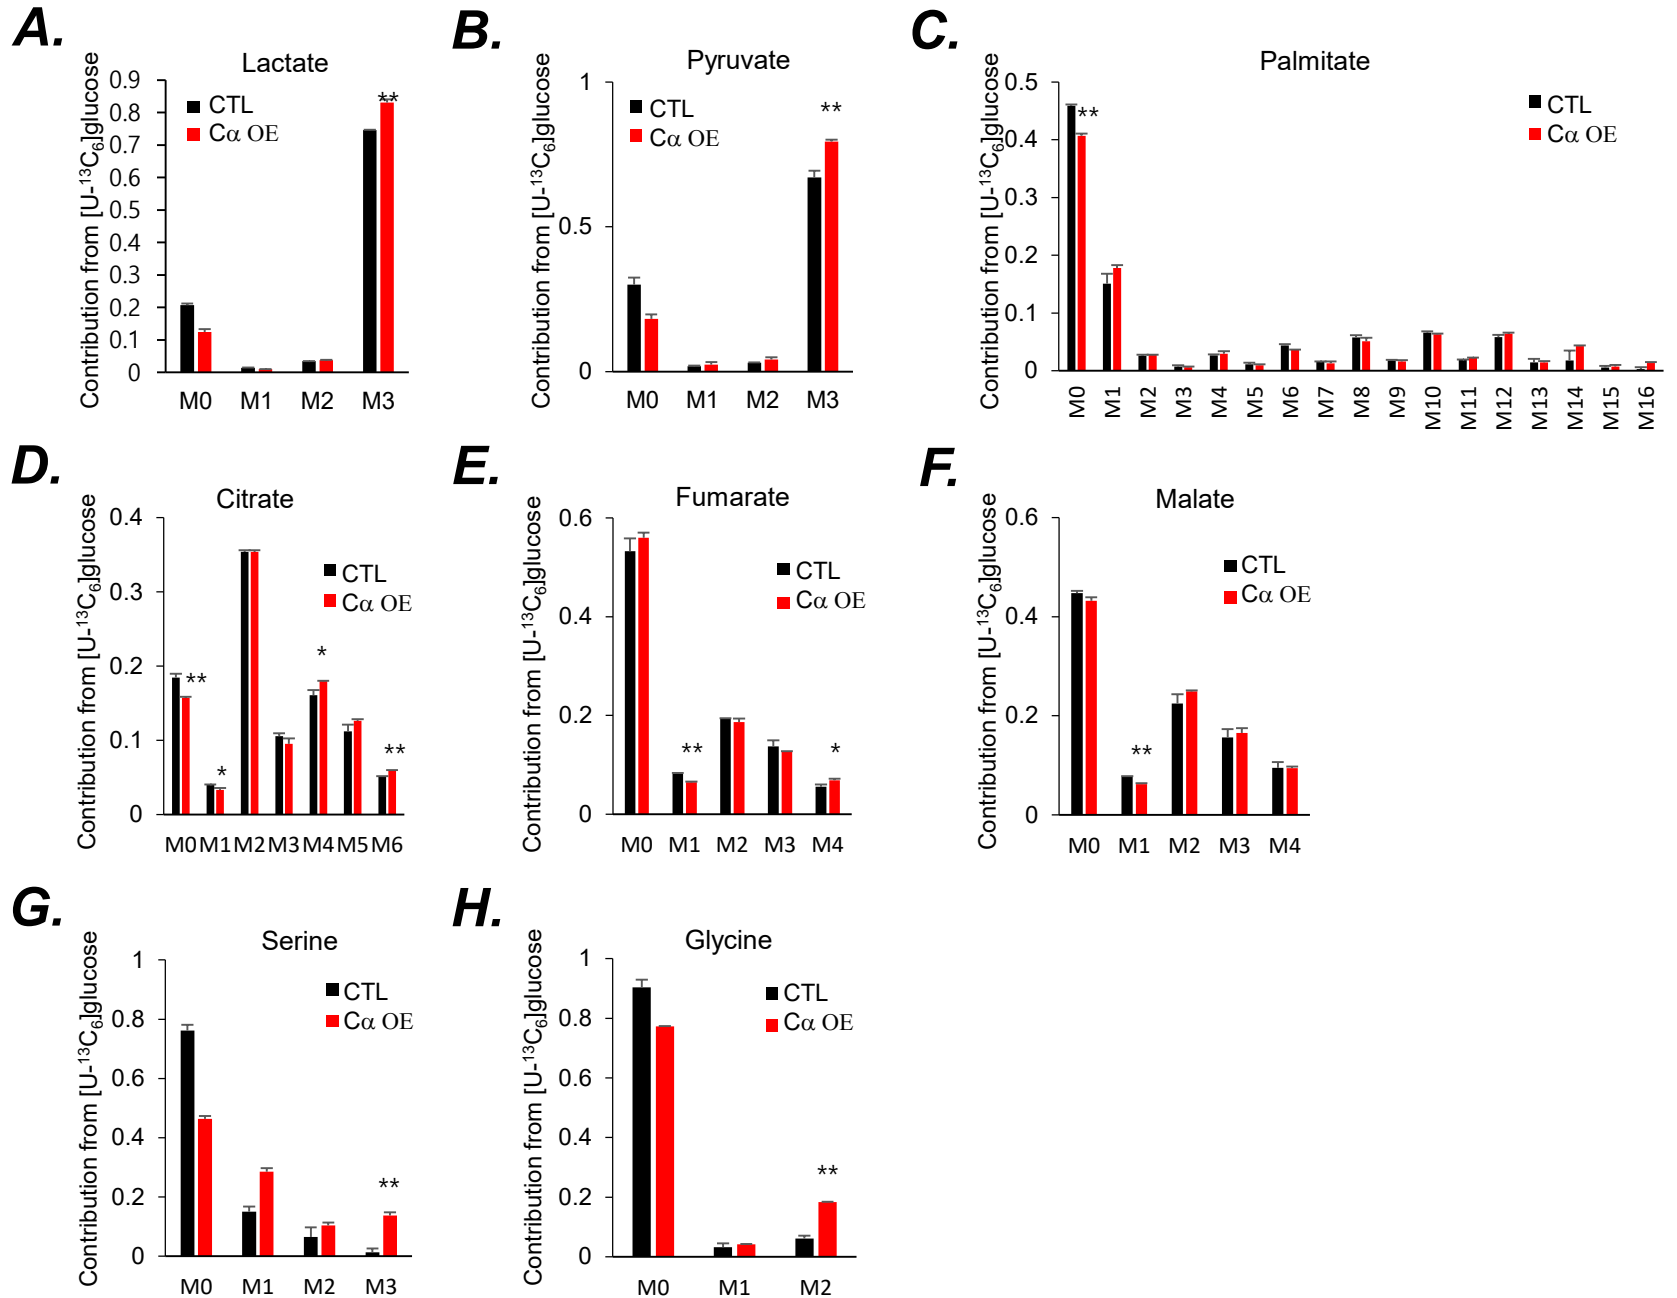

# Supplementary Figure S6

**A.**

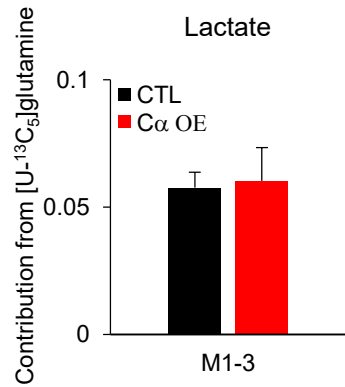

**B.**

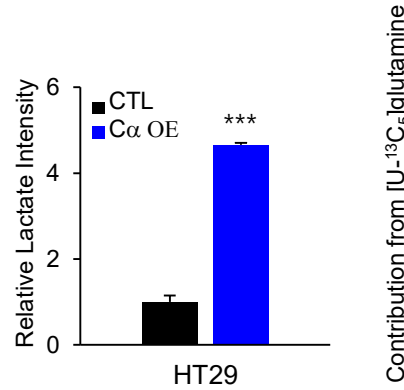

**C.**

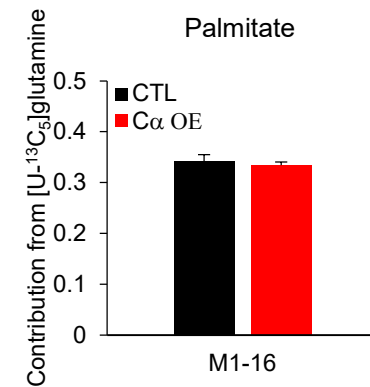

**D.**

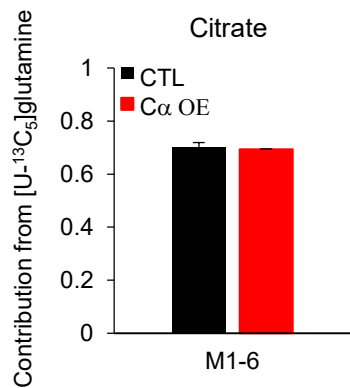

**E.**

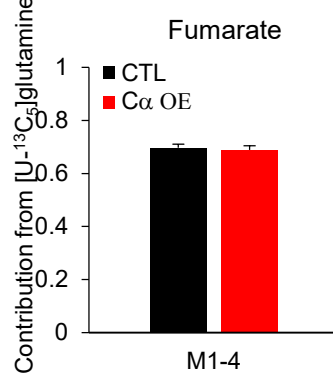

**F.**

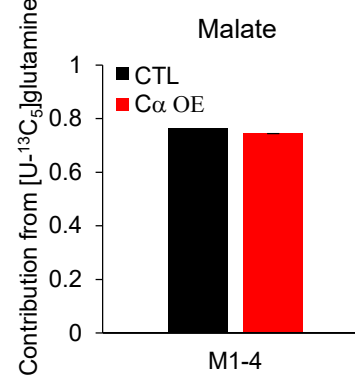

**G.**

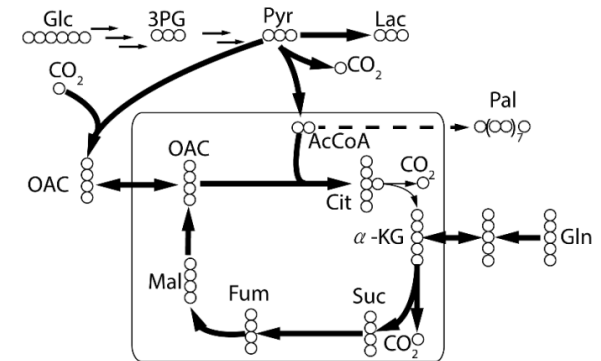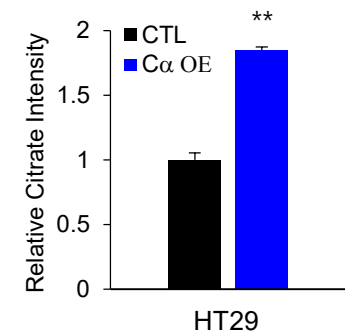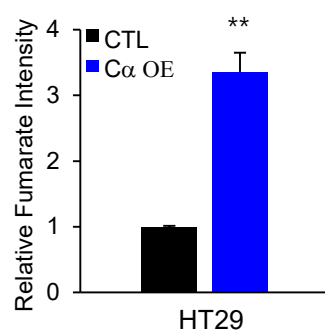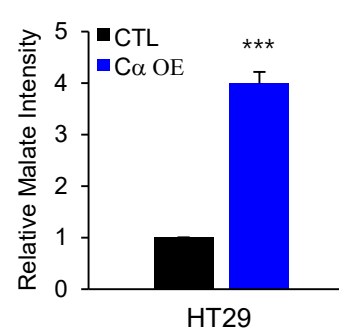

# Supplementary Figure S7

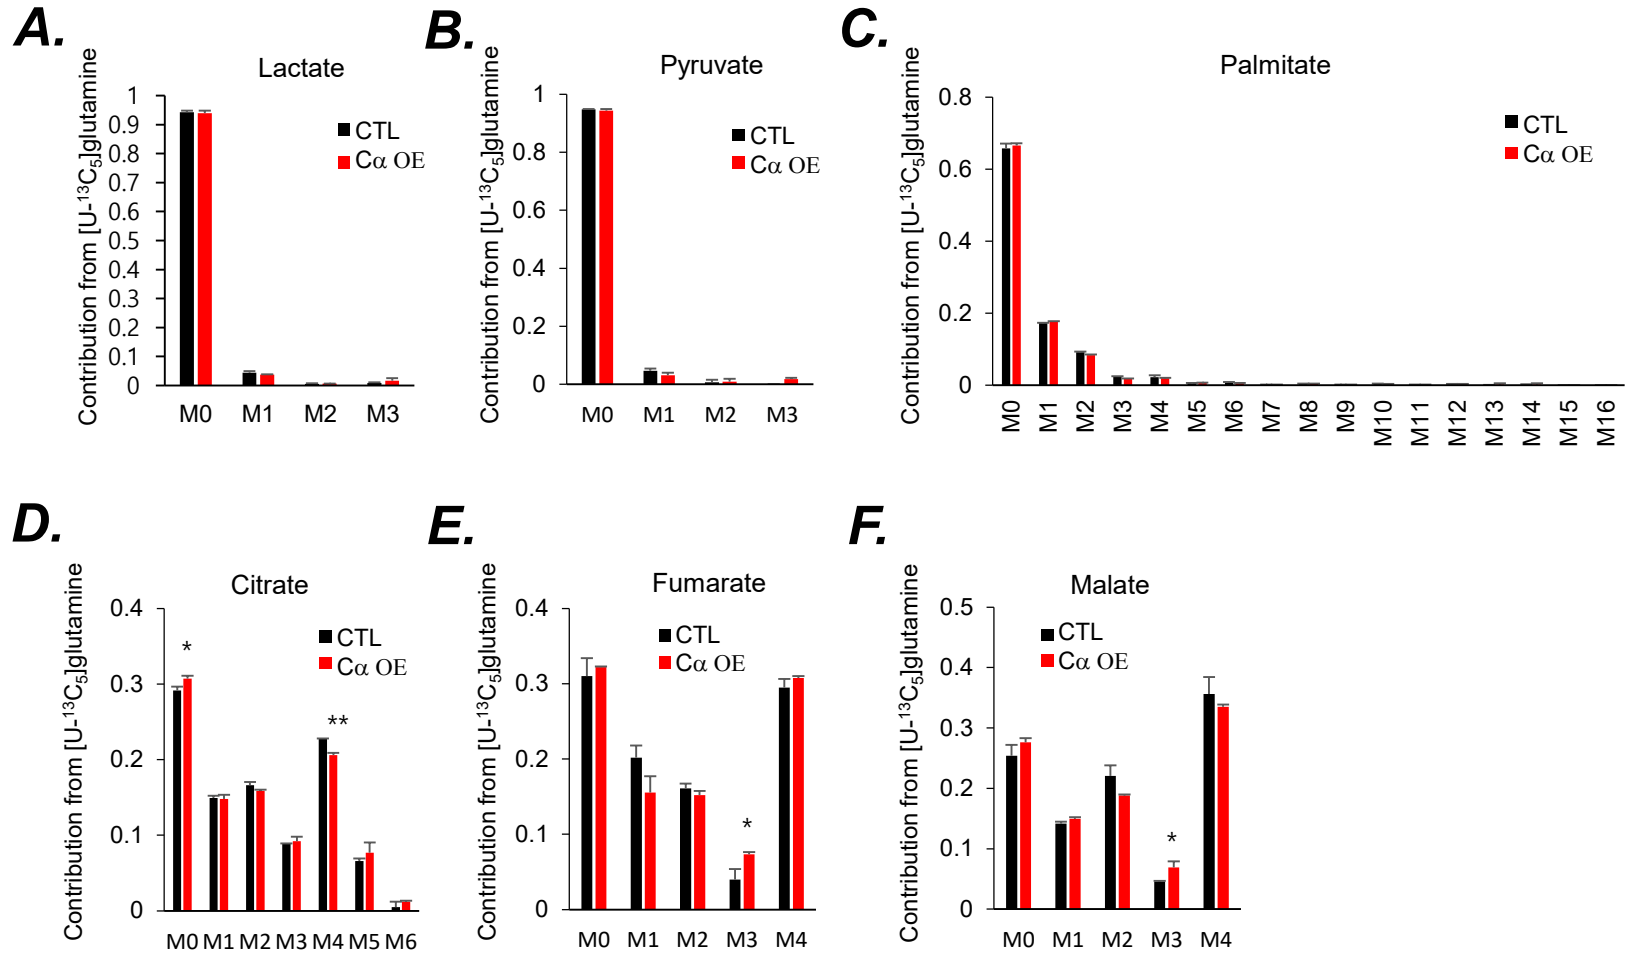

# Supplementary Figure S8

**A.**

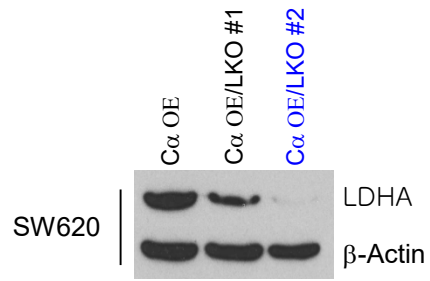

**B.**

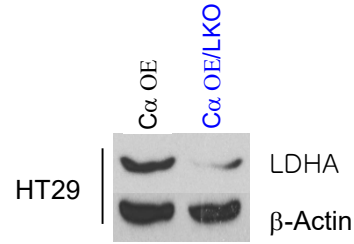

# Supplementary Figure S9

**A.**

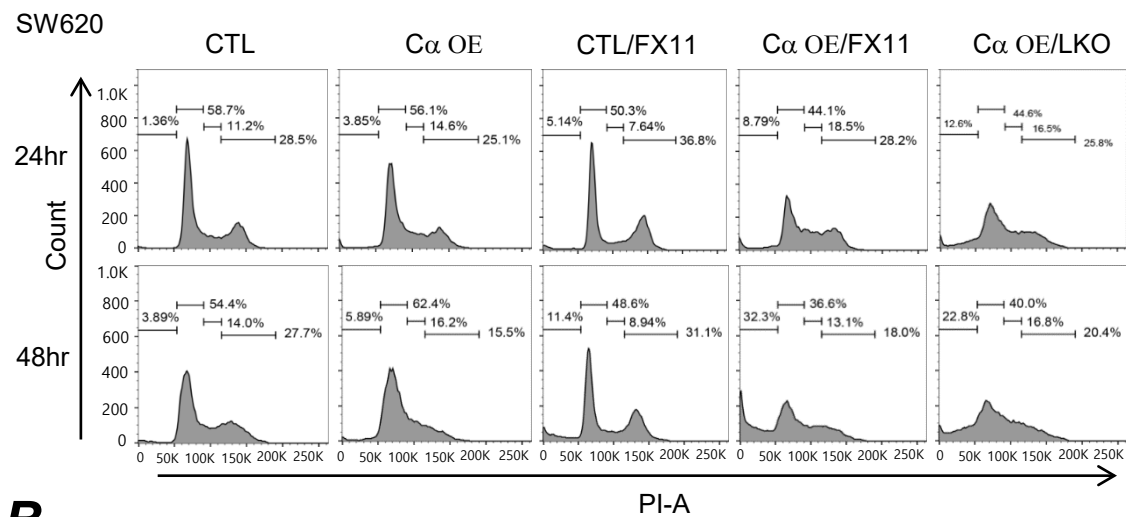

**C.**

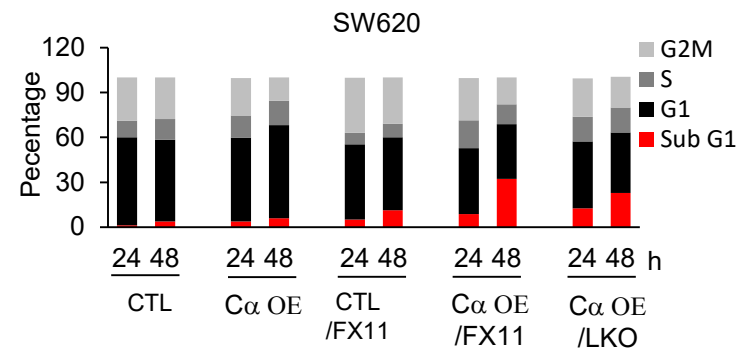

**B.**

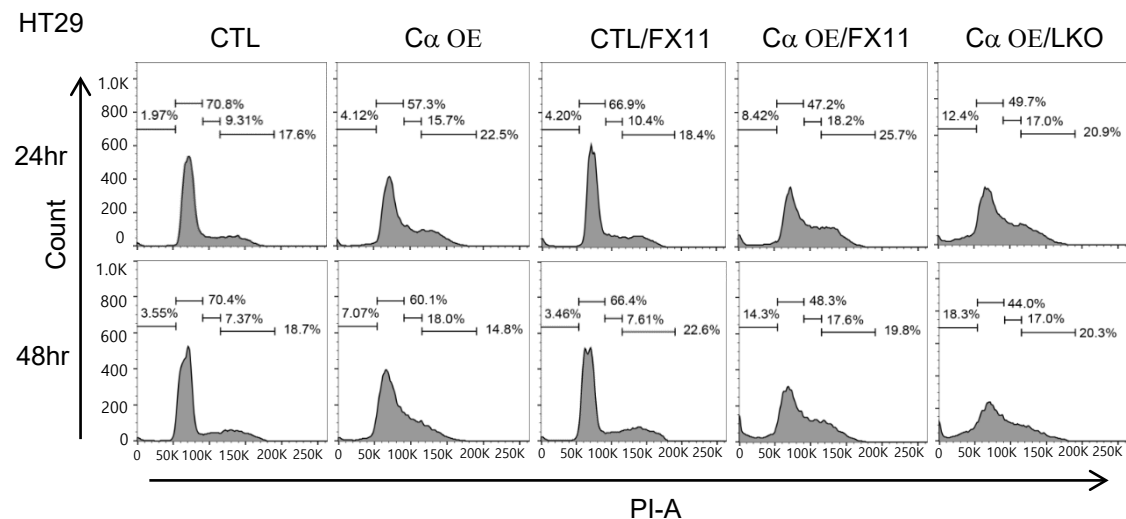

**D.**

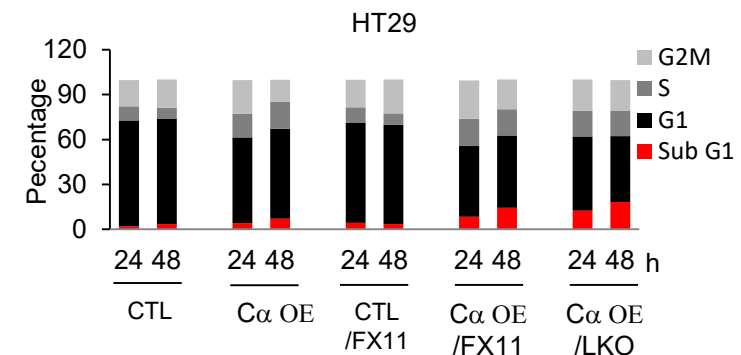

# Supplementary Figure S10

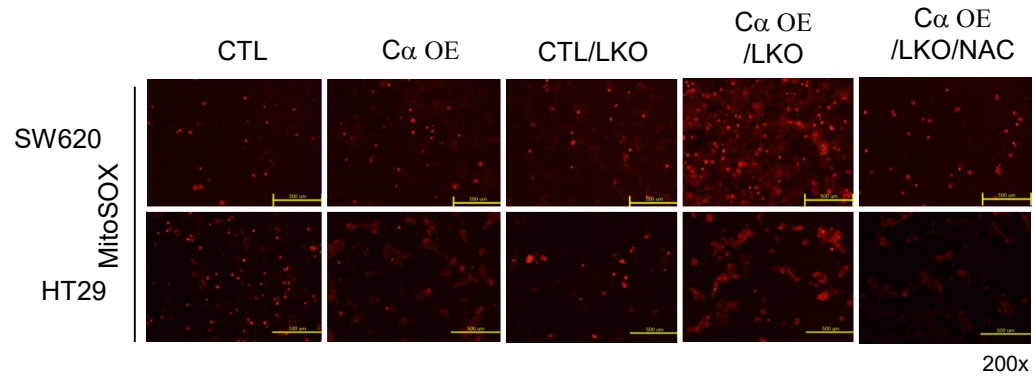

# Supplementary Figure S11

## A. Chemotactic migration assay

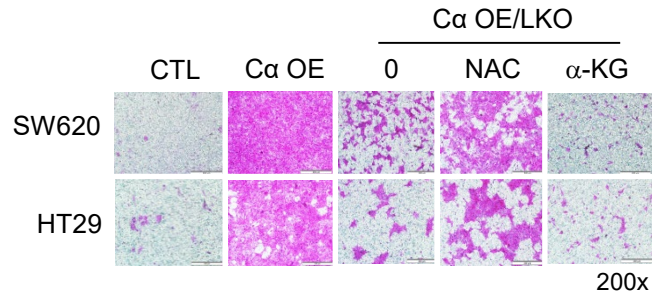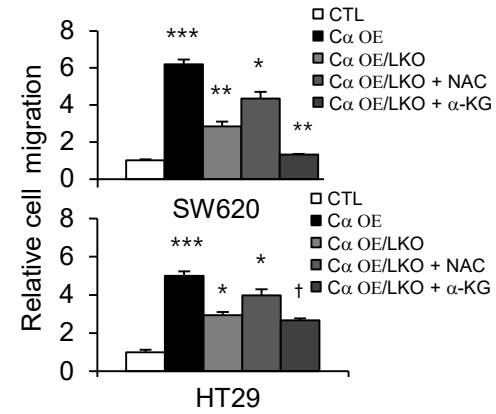

## B.

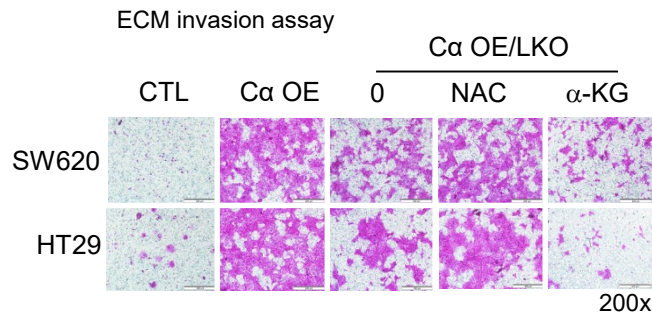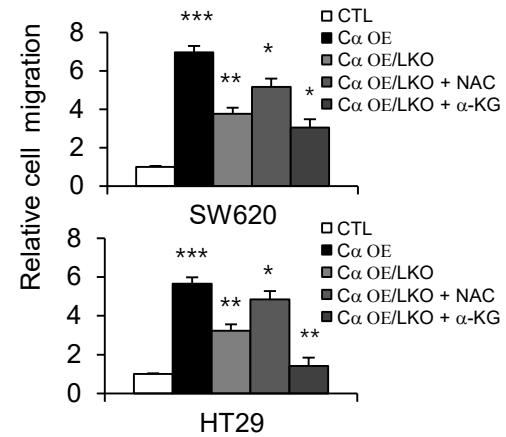

# Supplementary Figure S12

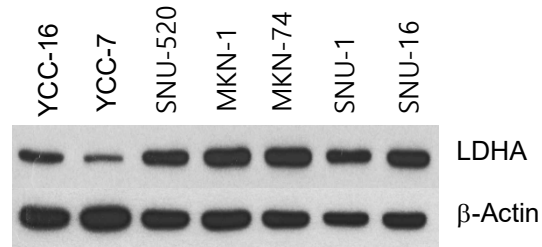



# Supplementary Figure S13

**A.**

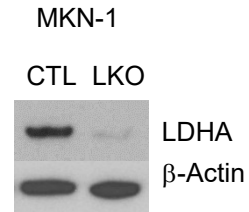

**B.**

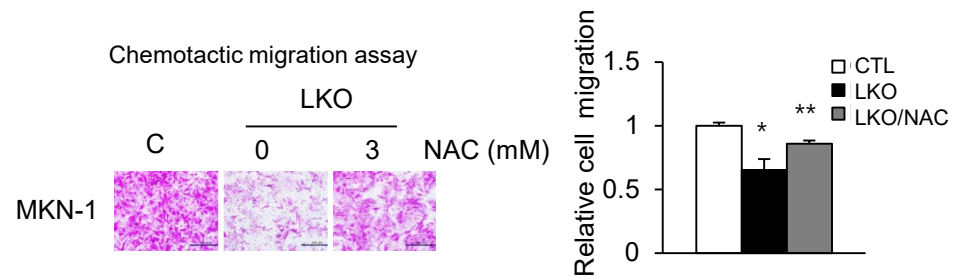

**C.**

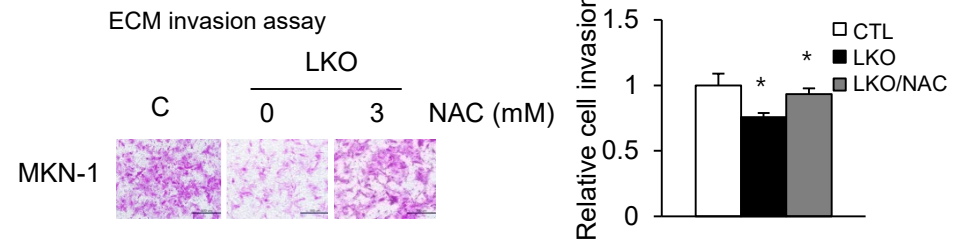

Supplement: 41598_2019_41852_MOESM1_ESM.pdf [file 41598_2019_41852_MOESM1_ESM.pdf]
